# Supplementary material
Source: publisher figshare collection journal article supplement (https://geolsoc.figshare.com/ndownloader/files/27996889)
Supplement: Supplementary file 1 [file 27996889]

Malakhova, I.G. 2012. Murchison Roderick Impey, Sir, 1st Baronet. Foreign members of the Russian Academy of Sciences, 18–21 Centuries. Geology and Mining Sciences. (Ed. Malakhova, I.G.) GC RAN, Moscow, 90-95. [Малахова И.Г. Мэрчисон (Мурчисон) Родерик Импи, сэр, 1-й баронет // Иностранные члены Российской академии наук 18-21 вв. Геология и горные науки. (отв. ред. Малахова И.Г.) Москва: ГЦ РАН, 2012. С. 90-95.]

- 90 -

**МЭРЧИСОН (МУРЧИСОН) Родерик Импи, сэр, 1-й баронет
(MURCHISON,**

**Roderick Impey, Sir, 1st Baronet)**

(1792–1871)

Британский геолог

Он стремился к почету и славе. Рыцарю Британской Короны, баронету, сэру Родерику Импи Мэрчисону было чем гордиться: геологическая наука обязана ему выделением трех периодов палеозойской эры. «Король силура» стал первым ученым, избранным в состав Академии наук России по специальности «геология».

Родерик Импи Мэрчисон родился 19 февраля 1792 г. в Шотландии – в поместье Таррадейл графства Россэнд-Кромарти (Росшир). Его отец, потомок древнего шотландского рода, много лет проработал врачом в Индии. Он умер, когда мальчику было 4 года. Семья прочила ребенку военную карьеру, и после окончания начальной школы в Дареме (графство Дарем) в 1805 г. он поступил в Королевский военный колледж Грейт Марлоу близ Лондона.

Науки мало привлекали юного Родерика, зато военная служба сулила славу, и он был готов на подвиги. В 1807 г. юноша был зачислен в пехотный полк, участвовал в военных действиях в Португалии и Испании, но война с Наполеоном закончилась. Гарнизонная служба не привлекала Р. Мэрчисона, его манила светская жизнь. В 1815 г. он женился на дочери генерала и вышел в отставку в чине драгунского капитана. Страсть к путешествиям привела молодую пару в Италию, и 2 года (1816–1818) там проведенные, по мнению главного биографа Р. Мэрчисона, *А. Гики*, повлияли на его судьбу больше, чем годы службы в армии. По возвращении на родину в 1818 г. Р. Мэрчисон продал поместье в Шотландии, обосновался в английском графстве Дарем и посвятил себя главному занятию британских аристократов – охоте на лис (Geikie, 1875a).

К научным занятиям Р. Мэрчисона склонила настойчивость образованной супруги, а также знакомство с химиком *Х. Дэви* и геологом У. Баклендом. Естественнонаучное образование Р. Мэрчисона ограничилось публичными лекциями в Королевском институте Лондона, которые он посещал с 1812 г. Его привлекала не столько наука, сколько само научное общество. Выбор пал на геологию, так как этот род интеллектуальных занятий требовал постоянного пребывания на воздухе (Geikie, 1875a).

Р. Мэрчисон начал действовать с военной решительностью. В 1824 г. переехал в Лондон и стал регулярно бывать на лекциях в Королевском институте и на заседаниях Геологического общества Лондона, членом которого был избран в 1825 г.

В первой четверти XIX в. Англия переживала небывалый научный подъем. В стране рождалась современная геология, и общительный Р. Мэрчисон свел знакомство с людьми, стоявшими у ее истоков: одним из «отцов-основателей» первого в мире Геологического общества Лондона *Х. Дэви*; первым штатным сотрудником Общества Т. Вебстером; автором первой геологической карты (1815) У. Смитом; оксфордским профессором У. Баклендом, составившим первую сводную стратиграфическую шкалу Англии (1823). Под его руководством Р.Мэрчисон учился полевой геологии и в 1825 г. сделал первый доклад в Геологическом обществе по мезозойским отложениям Южной Англии «Geological sketch of the north-western extremity of Sussex, and the adjoining parts of Hants and Surrey».

Публикация по угленосным отложениям Англии и Шотландии 1826 г. и работа на посту секретаря Геологического общества (1826–1828 гг. и 1829–1831 гг.) сделала начинающего исследователя известным в научных кругах.

- 91 -

С изучения геологии Шотландии началось в 1827 г. сотрудничество Р. Мэрчисона с А. Седжвиком. В 1828 г. он побывал на континенте – во Франции, Швейцарии, Италии, Германии. Наряду с впечатлениями от увиденных природных объектов Р. Мэрчисон приобрел новых знакомых, среди них были *Ж. Кювье*, *Л. Эли де Бомон*, К. Прево, Н. Демаре. По вулканическим областям Франции и Италии Р. Мэрчисон проехал вместе с еще одним геологом-дилетантом – *Ч. Лайелем*. Сначала Р. Мэрчисон разделял идеи будущего идеолога современной геологии, однако позднее стал противником концепции униформизма. В 1832 г. была опубликована совместная статья Р. Мэрчисона и *Ч. Лайеля* о строении Восточных Альп «A sketch of the structure of the Eastern Alps». Сложная альпийская тектоника привела Р. Мэрчисона к выводу о действии катастрофических сил.

В 1830 г. Р. Мэрчисон вновь оказался в Германии, где встречался с *А. Гумбольдтом* и вел научные беседы с лидером немецких геологов *Л. Бухом*, к взглядам которого относился с особым вниманием.

С 1831 г. Р. Мэрчисон полностью сосредоточился на изучении палеозойских отложений Британии. Благодаря работам У. Смита (1815– 1822) в Англии были выделены вторичные и третичные отложения. В 1822 г. У. Конибэр и У. Филлипс установили каменноугольную систему («Outline of the geology of England and Wales»). Ниже по разрезу выделялся «древний красный песчаник» – «Old Red Sandstone» (верхний силур–нижний карбон в современном толковании) и «немая» граувакковая толща. Последняя вызывала сомнения в применении палеонтологического метода для установления ее возраста до тех пор, пока Р. Мэрчисон не нашел на границе Англии и Уэльса прекрасный разрез с обильной фауной, позволяющей проследить переход от «древнего красного песчаника» к подстилающим отложениям. На первом же заседании Британской ассоциации развития науки 1831 г. Р. Мэрчисон заявил о своем открытии. После дополнительных исследований в статье 1835 г. «On the Silurian System of rocks» он назвал выделенную систему силуром по кельтского племени силуров, населявшего территорию Уэльса во времена Римской империи (Rudwick, 1974).

В 1839 г. Р. Мэрчисон опубликовал монографическое исследование по силурийской системе «The Silurian System, founded on geological researches in the Counties of Salop, Hereford, Radnor, Montgomery, Caermarthen, Brecon, Pembroke, Monmouth, Gloucester, Worcester, and Stafford; with descriptions of the coal-fields and overlying formations» c таблицами окаменелостей, разрезами и цветной геологической картой. Сочинение посвящалось другу – «Тебе, мой дорогой Седжвик» (цит. по: Harries Davies, 2007, p. 115).

С начала 1830-х годов А. Сэджвик, Р. Мэрчисон и У. Лонсдейл изучали разрезы Девоншира и Корнуолла и на основании палеонтологических данных пришли к выводу, что отложения, принимавшиеся ими ранее за верхнесилурийские, а Г. Де ла Бичем – за нижнекаменноугольные, на самом деле имеют один возраст с «древним красным песчаником». В 1839 г. А. Седжвик и Р. Мэрчисон заявили: «Для всей мощной промежуточной толщи отложений, заключенной между силурийской и каменноугольной системами, мы предлагаем термин “девонская система”» (Sedgwick, Murchison, 1839, p. 259).

Если силурийская система быстро получила признание геологов, то выделение девона ставилось в Англии под сомнение. Фациальная изменчивость девонских свит не находила объяснений. Не хватало и палеонтологических данных. Нужны были веские доказательства, и Р. Мэрчисон нашел их – в России!

Сначала он отправился в Германию, где обнаружил «граувакковую» формацию. Немаловажную роль сыграло и предположение кумира Р. Мэрчисона *Л. Буха* о распространении верхнепалозойских отложений на северо-западе России (см. очерк «*Л. Бух*»).

В России девон был установлен в 1839– 1841 гг. благодаря работам русских геологов, в частности Г.П. Гельмерсена и А.И. Оливьери, и палеонтологическим описаниям собранных коллекций, выполненным Э.И. Эйхвальдом и *Л. Бухом* (Тихомиров, 1963). В 1850-е годы Х.И. Пандер предложил трехчленное деление девона России. Его работы получили широкое признание, и для Р. Мэрчисона он стал одним из главных консультантов.

Решение отправиться в Россию было принято в Париже в 1840 г., где друг и товарищ по европейским путешествиям *Э. Вернёй* познакомил Р. Мэрчисона с русским географом и экономистом А.К. Мейендорфом, готовящим экспедицию для изучения промышленных областей и природных богатств России. А.А. Кейзерлинг и И. Блазиус уже были включены в состав экспедиции, к ним присоединились *Э. Вернёй* и Р. Мэрчисон. В мае 1840 г. они приехали в Берлин, чтобы проконсультироваться с участниками экспедиции *А. Гумбольдта* (1829) и, конечно, с *Л. Бухом*. Еще в феврале 1840 г. *Л. Бух* отправил в Лондон подробное письмо о своем видении геологии и стратиграфии Европейской России и прямо указал Р. Мэрчисону на области распространения силурийских, девонских, каменноугольных и юрских отложений. Данные о географии разрезов и

- 92 -

ископаемой фауне *Л. Бух* свел в таблицу (Geikie, 1875a).

По прибытии в Санкт-Петербург Р. Мэрчисон заручился поддержкой русского правительства. После осмотра окрестностей российской столицы, Онежского озера и Петрозаводска он решил отделиться от группы А.К. Мейендорфа, чтобы заняться чисто геологическими исследованиями. По северо-западу и центральным губерниям России Р. Мэрчисон и *Э. Вернёй* путешествовали в сопровождении выпускника Института Корпуса горных инженеров Н.И. Кокшарова ([Мэрчисон], 1841).

Р. Мэрчисон с удовлетворением обнаружил, что в пределах Европейской России на древнем кристаллическом фундаменте последовательно залегают отложения силура, девона и каменноугольного периода. Отсутствие тектонических нарушений и метаморфизма позволило установить сходство палеозойских разрезов Британских островов, России и континентальной Европы (данные по палеозою Бельгии и севера Германии были опубликованы Р. Мэрчисоном и А. Седжвиком в 1842 г. в статье «On the classification and distribution of the Older or Palaeozoic rocks of the North of Germany and of Belgium, as compared with formations of the same age in the British Isle»).

Р. Мэрчисон придавал большое экономическое значение выделению силурийской системы. Он считал, что именно на этом этапе геологической истории на Земле возникла органическая жизнь и ниже этой границы не могло происходить накопления слоев, содержащих остатки растений, т.е. каменного угля. В Англии, где уголь – главное природное богатство, Р. Мэрчисон быстро приобрел авторитет специалиста в этой области. Знаниями английского эксперта пожелали воспользовать и в России. Император лично интересовался подмосковными углями ([Мэрчисон], 1841, л. 57), и Р. Мэрчисону было направлено приглашение вновь посетить Россию. В планы экспедиции входила также поездка по центральным губерниям России и на Урал.

В конце апреля 1841 г. Р. Мэрчисон и *Э. Вернёй* приехали в Санкт-Петербург. Британский геолог дважды встречался с императором Николаем I. Их беседы касались предстоящего путешествия и главной цели миссии – оценки перспектив разработки угля. Р. Мэрчисон побывал также в Институте Корпуса горных инженеров и встретился с Э.И. Эйхвальдом (Geikie, 1875a).

Экспедиция 1841 г. была прекрасно организована – транспорт, объекты посещения, расчищенные разрезы, образцы горных пород, геогностические карты и т.д. Программа пребывания была разработана штабом Корпуса горных инженеров, и письма об оказании содействия Р. Мэрчисону, *Э. Вернёю* и прикомандированных к ним А.А. Кейзерлингу и Н.И. Кокшарову были направлены во все пункты следования ([Мэрчисон], 1841). В связи с этим весьма критично оценивавший присутствие иностранцев в России Э.И. Эйхвальд подчеркивал чрезмерную щедрость правительства. Он признавал достижения геологов английской школы и считал, что Р. Мэрчисон «для нас, в особенности, важен тем, что он, во время вторичного ученого путешествия по России и Уральским горам, на иждивении Русского правительства, успел определить границы большей части горных формаций нашего отечества» (Эйхвальд, 1846, с. 24), однако «если бы русские геологи имели те же средства от правительства, как г. Мурчисон, то они были бы также в состоянии гораздо более содействовать развитию геологии в России» (Там же, с. 412).

Путешествие длилось 5 месяцев. Москва, Подмосковный и Донецкий угольные бассейны, Поволжье, Урал – по такому маршруту перемещались отряды (Шатский, 1941; Яблоков, 1954; Тихомиров, 1963).

Первостепенное значение имело установление новой геологической системы – единственной, получившей русское имя. Р. Мэрчисон впервые увидел пермские отложения в Центральной России, но, несмотря на собственные сомнения и мнение Н.И. Кокшарова (Шафрановский, 1964), воздержался от определения возраста горизонта. Термин «пермь» (пермская система) Р. Мэрчисон впервые употребил в письме, адресованном выпускнику Горной академии Фрайберга профессору Императорского Московского университета Г.И. Фишеру (фон Вальдгейму).

Ученых связывала дружба и активная переписка. В 1805 г. Г.И. Фишер стал основателем и директором (1805–1853 гг.) первого научного общества России – Императорского Московского общества испытателей природы (МОИП) и в 1820 г. был избран членом Геологического общества Лондона. В 1840 г. членом МОИП стал Р. Мэрчисон. В письме о выделении пермской системы Р. Мэрчисон просил Г.И. Фишера сообщить о своем открытии (Geikie, 1875a), и в 1841 г. в «Горном журнале» вышла публикация «Геологические наблюдения в России. Письмо к Фишеру фон Вальдгейму».

Двухтомная монография Р. Мэрчисона, *Э. Вернёя* и А.А. Кейзерлинга «The geology of Russia in Europe and the Ural mountains» была опубликована в 1845 г. Первая сводка по России – результат коллективного труда. Р. Мэрчисон при написании 1-го, геологического, тома использовал данные Х.И. Пандера, Г.И. Щуровского, Г.П.

- 93 -

Гельмерсена, Ф.Ф. Вангенгейма фон Квалена, С.С. Куторги, Г.И. Фишера фон Вальдгейма. Минералы были описаны Н.И. Кокшаровым. Определения для 2-го, палеонтологического, тома выполняли А. д’Орбиньи, У. Лонсдейл, *Р. Оуэн*, *Л. Агасси*. Карта составлена по данным Г.А. Абиха, Э.И. Эйхвальда, Г.П. Гельмерсена.

В 1849 г. книга Р. Мэрчисона, *Э. Вернёя* и А.А. Кейзерлинга вышла на русском языке – «Геологическое описание Европейской России и хребта Уральского» в переводе А.Д. Озерского, с примечаниями и новыми данными. Первая монография по геологии России стала учебником для многих поколений исследователей.

К важнейшим результатам исследований экспедиции Р. Мэрчисона в России следует отнести определение времени образования Уральского хребта, составление первой геологической карты Европейской России и Урала масштаба 150 верст в 1 дюйме. Р. Мэрчисон дал в целом правильный анализ геологического строения Донецкого угольного бассейна (Яблоков, 1954), оптимистично оценил перспективы подмосковного угля, хотя, как следует из рапорта Н.И. Кокшарова начальнику штаба Корпуса горных инженеров: «Тульская губерния представляет много признаков к отысканию угля, но вместе с тем не подает большой надежды открыть этот горючий материал столь добротным, каков английский» ([Мэрчисон], 1841, л. 153об).

Р. Мэрчисону принадлежат интересные выводы о геологическом строении Европейской России – он выделил Московскую и Донецкую тектонические депрессии, разделенные поднятиями. Важны были палеогеографические реконструкции для объяснения фациальной изменчивости отложений в пределах угольных бассейнов Центральной России и Урала. Призыв обращать «особое внимание к прежней географии земной поверхности» (Мурчисон, Вернейль, Кейзерлинг, 1849, ч. 1, с. 595) был услышан. Исследователь русской юры Г.А. Траутшольд в 1862 г. опубликовал первую в России палеогеографическую карту под названием «Вероятное распределение моря и суши в юрское время в Европейской России, представленное на основе геогностической карты Мурчисона» (Соловьев, 1966).

Р. Мэрчисон, стремившийся к научной славе, мог гордиться результатом, достигнутым в России. В одном из рапортов на имя начальника штаба Корпуса горных инженеров во время второго путешествия в Россию содержалось примечание о желании британского геолога получить российскую награду за свои труды и высказывалось предложение «дать г. Мурчисону орден Св. Анны 2-й степени, а г. Вернелю Св. Владимира 4-го классса». На полях было помечено «Высочайше повелено 〈....〉Царское село 5 мая 1841 г.» ([Мэрчисон], 1841, л. 147). Награды были вручены (Geikie, 1875a).

Летом 1845 г. Р. Мэрчисон и *Э. Вернёй* приехали в Санкт-Петербург, чтобы лично передать свой труд Николаю I. Император оценил работу ученых – все участники экспедиции стали членами Императорской Санкт-Петербургской академии наук. Но первым был Р. Мэрчисон.

5 сентября 1845 г. на заседании Физико-математического отделения было зачитано согласие президента Академии на предложение адъюнкта Г.П. Гельмерсена об избрании Р. Мэрчисона в число почетных членов «в уважение отмеченных трудов его по части геологии и важных открытий, сделанных им в троекратном путешествии по России и изложенных в ученом творении поднесенном им лично Государю Императору» (Протоколы ОС ИАН, 1845, No IX, § 92). Кандидат был избран единогласно. 6 сентября 1845 г. Общее собрание утвердило это решение (Тамже).

Благодаря Р. Мэрчисону специальность «геология» вошла в список дисциплин Императорской Санкт-Петербургской академии наук. Уникальное решение по членству Р. Мэрчисона было принято 19 сентября 1845 г.: иностранный ученый был избран ординарным академиком (Протоколы заседаний ФМО ИАН, 1845, No ХIV, § 230). «24 октября 1845 г. Николай I Указом Правительствующему сенату от 21 сентября за особые заслуги в области геологических изысканий на территории России, обогативших страну новыми открытиями, повелел предоставить Р.И. Мурчисону права и преимущества ординарного академика и считать его на действительной службе при Академии наук» (цит. по: Летопись Российской академии..., 2002, с. 338).

В 1848 г. членом-корреспондентом Академии был избран А.А. Кейзерлинг (с 1887 г. – ординарный академик). *Э. Вернёй* получил звание члена-корреспондента Императорской СанктПетербургской академии наук в 1856 г. (см. очерк «*Э. Вернёй*»).

Ответным жестом можно считать избрание российского академика Г.П. Гельмерсена в состав британских научных обществ: почетный член Королевского географического общества (1846 г.), корреспондент Геологического общества Лондона (1851 г.).

Р. Мэрчисон направлял в Санкт-Петербург результаты исследований. Так, в 1849 г. Г.П. Гельмерсен ознакомил членов академического собрания с его работой о геологическом строении Альп, Апеннин и Карпат (1848), написанной по результатам путешествия по Европе в 1847–1848 гг. (1848) (Летопись Российской

- 94 -

академии..., 2002). В изданиях Императорского Русского географического общества публиковалась информация об исследованиях Р. Мэрчисона по линии Королевского географического общества: о месторождениях золота и ртути в Калифорнии (1851), мировых запасах золота (1852), развитии географической науки (1853). В 1867 г. английский геолог был избран в состав Императорского минералогического общества в Санкт-Петербурге.

После кончины ученого спутник двух его путешествий по России Н.И. Кокшаров отметил, что Р. Мэрчисон «постоянно сохранял чувства искренней приязни и благодарности к стране, в которой он встретил полное радушие и гостеприимство» (цит. по: Радовский, 1956, с. 259).

Успехи, достигнутые в России, значительно повысили самооценку и так не страдавшего излишней скромностью Р. Мэрчисона и сделали его крайне нетерпимым к высказываниям оппонентов (Rudwick, 1974). Он любил, когда его называли «Король силурии» и «Лорд граувакков» (Harries Davies, 2007). У *Ч. Дарвина* есть такая характеристика: «Пользу, которую Мурчисон принес геологии своей классификацией древних формаций, трудно переоценить; однако он далеко не обладал философским складом ума. Он был очень добросердечен и чрезвычайно старался оказать услугу любому человеку. Размеры, до которых доходило у него преклонение перед общественным положением человека, были смехотворны, и он проявлял это чувство и свое тщеславие с непосредственностью ребенка. Как-то он с необычайным ликованием рассказал в залах Геологического общества большому кругу людей, среди которых было много и не очень близко ему знакомых, как царь Николай, будучи в Лондоне, погладил его по плечу и сказал, имея в виду его геологические труды, “Мой друг, Россия благодарна вам!”» (Дарвин, 1957, с. 113).

Р. Мэрчисон плохо вопринимал новые идеи. Он буквально третировал Г. Де ла Бича за «инакомыслие» в стратиграфии девона. Не принимал теории материкового оледенения *Л. Агасси*, полагая, что только «дрифт» способен объяснить распространение льдов. Все жестче оппонировал *Ч. Лайелю* (Oldroyd, 1990; Harries Davies, 2007).

Тем, кто не разделял его убеждений в уникальности силурийского периода, Р. Мэрчисон адресовал издание 1854 г., дополненное новыми данными по континентальной Европе и Америке «Siluria: A history of the oldest known rocks containing organic remains, with a brief sketch of the distribution of gold over the earth» До 1872 г. книга четыре раза переиздавалась.

Но Р. Мэрчисон умел быть благодарным. Второе издание ««Siluria...» 1854 г. он посвятил своим сторонникам *Э. Вернёю*, А. Кейзерлингу и *Й. Барранду.* Двое из них были товарищами Р. Мэрчисона по экспедиции в Россию. Стратиграфия Богемии, разработанная *Й. Баррандом,* легла в основу обобщений Р. Мэрчисона (Oldroyd, 1990). Монография включала данные Х.И. Пандера по богатому ископаемой фауной русскому девону.

Р. Мэрчисон стремился расширить свои силурийские «владения». Во время путешествия по Скандинавии в 1844 г. он отнес к «азойским» все породы, подстилающие силур. Когда *Й. Барранд* обнаружил там кембрийскую фауну, Р. Мэрчисон просто опустил границу силура. Из-за спора о границе между кембрием и силуром он потерял «любимого» А. Седжвика. Когда Р. Мэрчисон выделил силурийскую систему, А. Седжвик предложил отнести нижележащие породы к кембрийской системе (1835). Постепенно, пользуясь недостатком палеонтологических данных, Р. Мэрчисон просто «аннексировал» верхний кембрий в пользу нижнего силура (Rudwick, 1974). Открытый конфликт между геологами разгорелся в 1852 г. после публикации А. Седжвика, и бывшие друзья стали врагами. А. Седжвик даже не пришел на похороны Р. Мэрчисона. Только в 1879 г. их «помирил» Ч. Лэпуорт, выделив между кембрием А. Сэджвика и силуром Р. Мэрчисона новую систему – ордовикскую (Harries Davies, 2007).

В 1855 г. Р. Мэрчисон впервые получил должность профессионального геолога – он сменил Г. Де ла Бича на посту директора Геологической службы Великобритании. В том же году он возглавил Музей практической геологии в Лондоне. В 1856 г. участвовал в работе Комиссии по оценке национальных запасов угля. Одним из последних геологических деяний Р. Мэрчисона стало создание кафедры геологии и минералогии в Университете Эдинбурга. Он предполагал упомянуть об этом в завещании, но желание видеть заведующим «кафедрой Мэрчисона» своего лучшего ученика, заставило его сделать прижизненное пожертвование, и в 1871 г. *А. Гики* занял этот пост (Geikie, 1875a).

Р. Мэрчисон опубликовал около 180 научных работ, и его заслуги были высоко оценены в Великобритании. В 1846 г. он был возведен в рыцарское звание (коммандор ордена Бани), в 1866 г. получил титул баронета.

Королевское общество Лондона поощряло интерес к науке богатых аристократов, и еще молодым человеком Р. Мэрчисон был избран в Британскую академию (1826 г.), но медали Копли в 1849 г. был удостоен за научные заслуги. В письме непременному секретарю Императорской Санкт-Петербургской академии наук

- 95 -

британский геолог с гордостью сообщил, что высшая награда его страны была присуждена ему за «установление палеозойской классификации, включая силурийскую систему, и за мой труд о России и об Уральский горах» (цит. по: Радовский, 1956, с. 264).

С 1845 г. Р. Мэрчисон – почетный член Королевского общества Эдинбурга, в 1859 г. награжден медалью Макдугалла Брисбена за геологические исследования в Северном нагорье Шотландии (Oldroyd, 1990).

Р. Мэрчисон неоднократно возглавлял геологическую и географическую секции Британской ассоциации развития науки, в 1846 г. был избран президентом Ассоциации. Дважды он занимал пост президента Геологического общества Лондона (1831–1833 гг., 1841–1843 гг.). В 1864 г. получил высшую награду Общества – медаль Волластона.

Последние годы Р. Мэрчисона были связаны в основном с деятельностью Королевского географического общества, одним из основателей которого он был в 1830 г. и трижды избирался президентом (1843–1845, 1851–1853, 1856–1859 гг.). Почетный доктор университетов Кембриджа, Оксфорда и Дублина.

В 1844 г. Р. Мэрчисон был избран корреспондентом Академии наук Института Франции по секции минералогии, в 1868 г. получил звание иностранного члена и премию Кювье. С 1839 г. состоял членом Геологического общества Франции, член-корреспондент Королевской академии наук в Берлине (1847 г.) и иностранный член Баварской академии наук (1857 г.)**.**

Родерик Импи Мэрчисон скончался 22 октября 1871 г. от бронхита в своем лондонском доме. Похоронен на Бромптонском кладбище рядом с женой (Geikie, 1875a).

По завещанию ученого сумма в 1000 фунтов стерлингов была передана Геологическому обществу Лондона для создания фонда его имени и учреждения специальной ежегодной награды Общества – медали Мэрчисона. Присуждается с 1873 г. (Woodward, 1907).

Еще при жизни Р. Мэрчисон передал свой архив «духовному сыну», и в 1875 г. *А. Гики* опубликовал двухтомную биографию, дневники и письма Р. Мэрчисона (Geikie, 1875a).

Именем Р.Мэрчисона названы кратер на Луне и около 15 земных объектов, среди которых мыс на полуострове Боотия-Феликс, горная вершина в Новой Зеландии, один из островов Королевы Шарлотты, река на западе Австралии, каскад нильских водопадов в Уганде. Вершина 3333 м в Скалистых горах Канады (провинция Альберта) носит имя британского геолога.

В честь Р. Мэрчисона назван род брюхоногих моллюсков *Murchisonia*, широко распространенный в девонских и каменноугольных отложениях, а также калиевый полевой шпат с золотистым отливом – мурчисонит.

Во дворе пермской школы No 9 в 2005 г. была установлена каменная плита с начертанными словами благодарности шотландскому геологу за присвоение последнему периоду палеозойской истории имени «пермь» (Памятный знак Р.И. Мэрчисону, 2005). Второй мемориал ученому открылся в 2009 г. в Свердловской области благодаря стараниям членов недавно созданного Уральско-Шотландского общества (Уральско-Шотландское общество, 2009).

Опубликованы дневниковые записи Р. Мэрчисона, сделанные во время его путешествий по России в 1840 и 1841 гг. (Murchison’s wanderings in Russia, 2004).

*Автор благодарит заслуженного профессора Университета Сиднея Д. Олдройда за присланные материалы и консультации при подготовке очерка.*
